# Supplementary material
Source: publisher figshare collection journal article supplement (https://sage.figshare.com/ndownloader/files/14033351)
Supplement: Supplementary file 1 [file 14033351]

## Supplementary Material

### Noise and the City: Leveraging crowd-sourced big data to examine the spatio-temporal relationship between urban development and noise annoyance

|                                                                                   |   |
|-----------------------------------------------------------------------------------|---|
| 1. Validity of the crowdsourced noise data extracted from the 311 system .....    | 1 |
| 1.1. Total 311 Call Volume by Year                                                |   |
| 1.2. Comparison with other complaints/service requests.....                       | 1 |
| 1.3. Analysis of super users .....                                                | 2 |
| 2. Potential confounders of noise complaints.....                                 | 3 |
| 2.1. Political participation.....                                                 | 3 |
| 2.2. Eating and drinking places.....                                              | 4 |
| 3. Mixed effect model formulation and diagnostics.....                            | 5 |
| 3.1. Model formulation.....                                                       | 5 |
| 3.2. Model diagnostics .....                                                      | 5 |
| 4. Historical trends and descriptive summary of construction and noise complaints | 6 |
| 5. Comparison of noise exemptions across North American cities .....              | 7 |

# 1. Validity of the crowdsourced noise data extracted from the 311 system

## 1.1 Total 311 Call Volume by Year

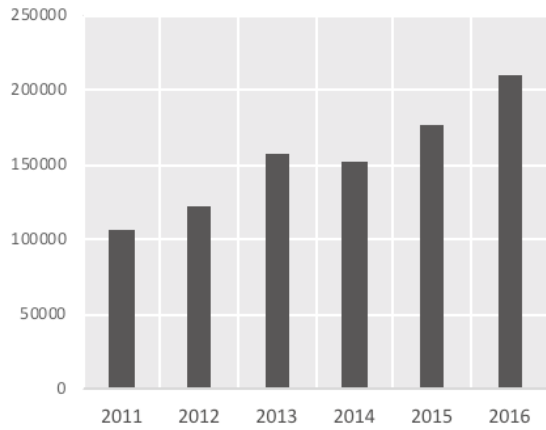

## 1.2 Comparison with other complaints/service requests

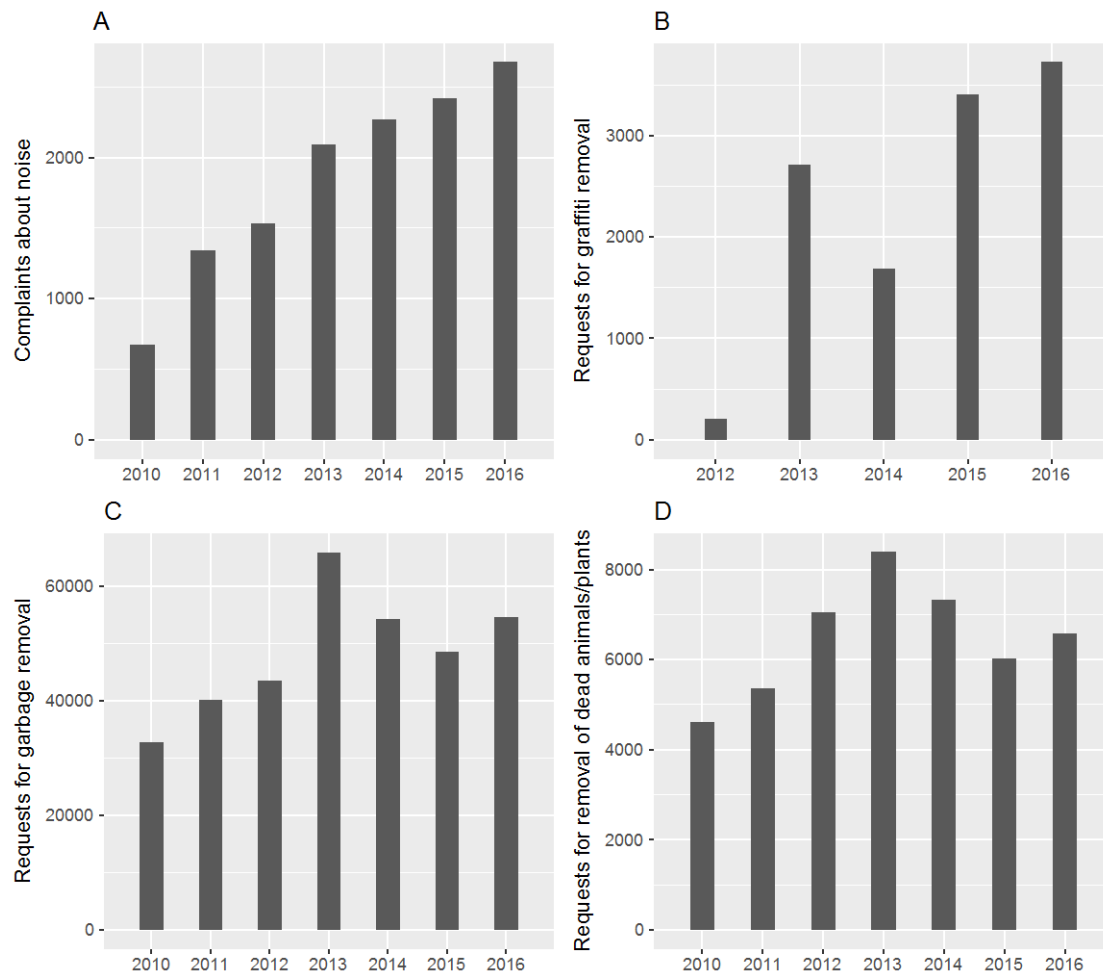

**Figure S1.** Temporal patterns of various complaints/service requests: a) noise complaints; b) requests for graffiti removal; c) requests for garbage removal; d) requests for removal of dead animals and plants

1.2. Analysis of super users

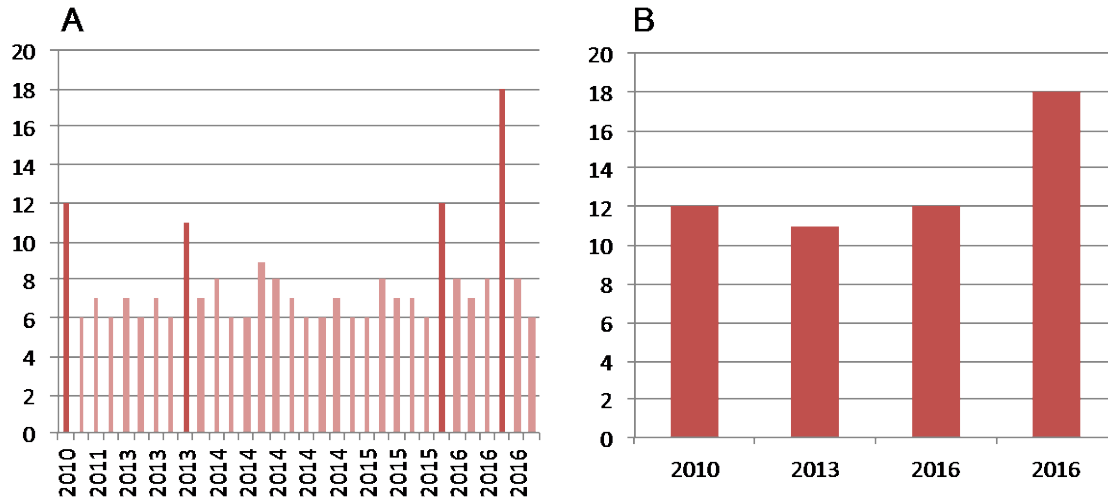

**Figure S2.** Analysis of super users: a) more than 5 repeat complaints/service requests from the same address; b) more than 10 repeat complaints/service requests from the same address

2. Potential confounders of noise complaints

2.1. Political participation

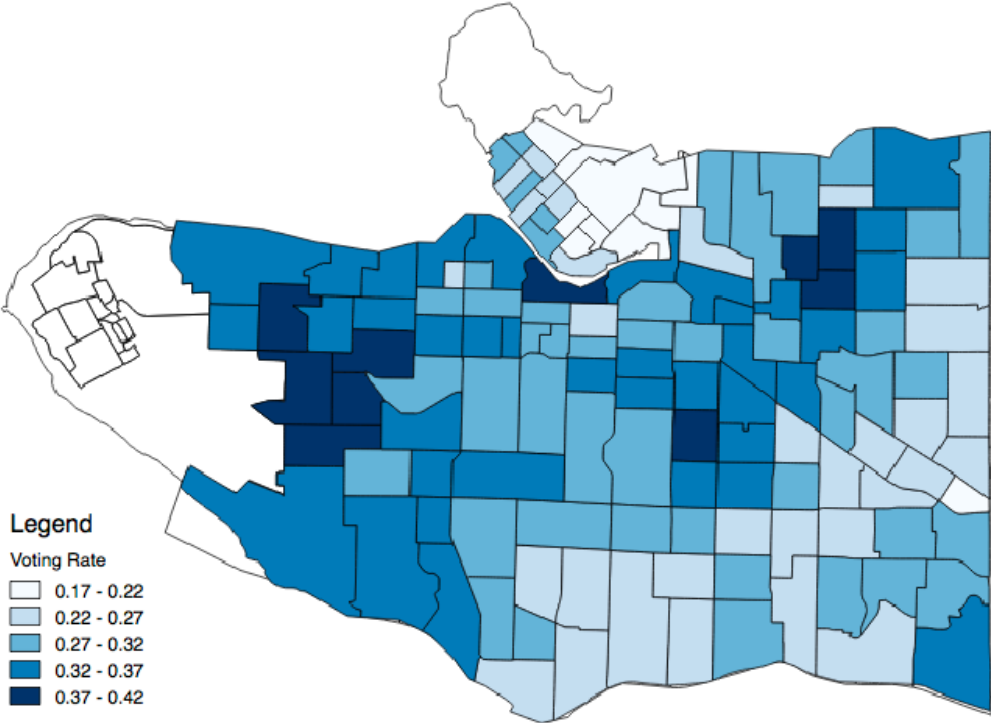

Figure S3. Geographic distribution of municipal voting results in 2017  
Source: City of Vancouver (2017a)

## 2.2. Eating and drinking places

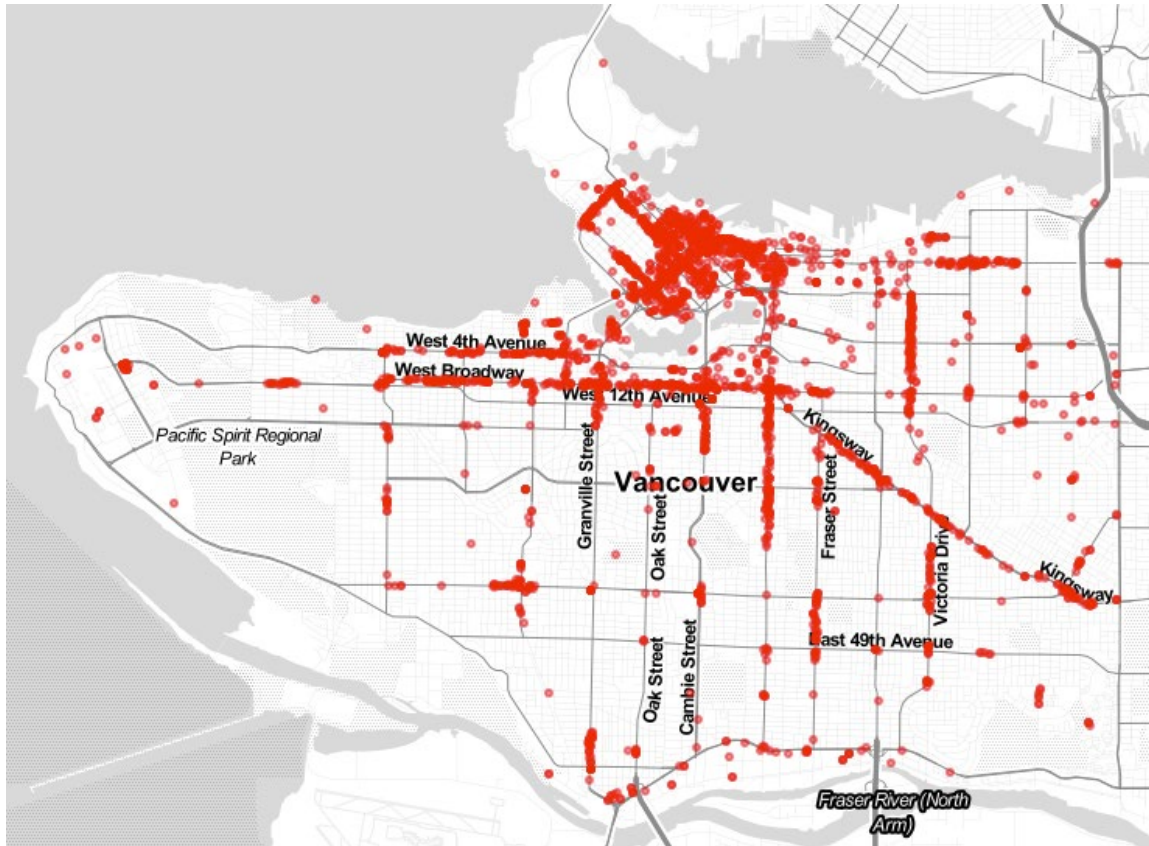

**Figure S4.** Geographic distribution of eating and drinking places in Vancouver in 2016.  
Source: DMTI (2016)

### 3. Mixed effect model formulation and diagnostics

#### 3.1. Model formulation

The functional form of the mixed effect model is as follows:

$$y_{ij} \sim \text{Poisson}(\mu_{ij})$$

$$\text{Level 1: } \log(\mu_{ij}) = \beta_{0j} + \beta_1 x_{1ij} + \beta_2 x_{2ij} + \beta_3 x_{3ij} + \beta_4 (x_{2ij} \times x_{3ij}) + \beta_5 x_{5ij} + \dots + \beta_n x_{nij} + \varepsilon_{ij}$$

$$\text{Level 2: } \beta_{0j} = \beta_0 + u_{0j}$$

$$\varepsilon_{ij} \sim N(0, \sigma^2), \quad u_{0j} \sim N(0, \tau^2), \quad (\text{Eq. 1})$$

where  $y_{ij}$  is the  $i$ -th observation of noise complaints per quarter in the  $j$ -th dissemination area;  $\beta_{0j}$  is the estimated mean for the  $j$ -th dissemination area.  $\beta_1, \beta_2$  and  $\beta_3$  denote individual fixed-effects estimators for year, quarterly construction activities, and after-hours for the  $j$ -th dissemination area.  $B_4$  denotes an interaction effect between construction activities and after-hours.  $B_5$  through  $\beta_n$  represent fixed-effects covariates, including demographic and socioeconomic controls, political participation, the number of proximate eating and drinking places, and transportation-related noise levels.

#### 3.2. Model diagnostics

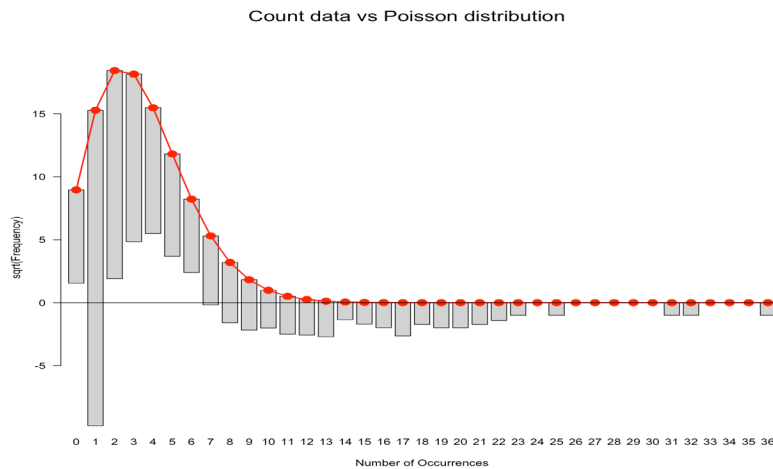

**Figure S5.** Distribution of noise complaints (2011-2016)

**Table S1.** Comparison of linear model and Poisson model

| Linear model |        | Poisson model |           |
|--------------|--------|---------------|-----------|
| Diagnostics  | Values | Diagnostics   | Values    |
| Mean         | 2.71   | Chisq         | 1605      |
| Var          | 9.76   | RDF           | 1281      |
| Ratio        | 3.60   | Ratio         | 1.2529274 |

#### 4. Historical trends and descriptive summary of construction and noise complaints

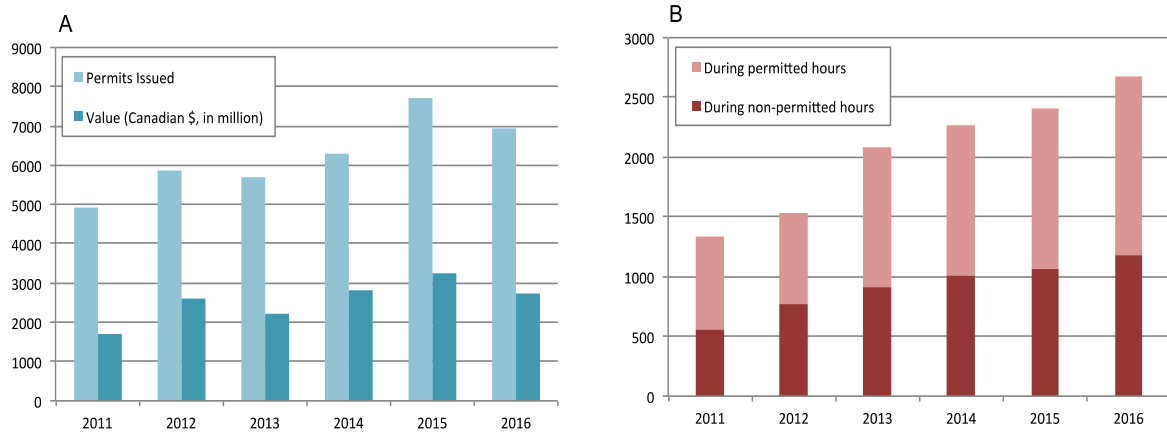

**Figure S6.** a) Issued building permits and construction values for Vancouver, Canada (2011 – 2016); b) Noise complaints (during permitted and non-permitted hours) from the 311 call data for Vancouver, Canada (2011 – 2016)

Note: The permitted hours for construction activities are defined as 7:30am - 8pm (Mon-Fri) and 10am - 8pm (Sat) for private properties; and 7:30am - 8pm (Mon-Sat) and 10am - 8pm (Sun & holidays) for city streets (City of Vancouver, 2016). Data come from: (a) City of Vancouver (City of Vancouver, 2018); (b) City of Vancouver (City of Vancouver, 2017b)

**Table S2.** Descriptive summary of key variables of interest (2011 – 2016)

| Year | Major construction     |       | Noise complaints       |       |
|------|------------------------|-------|------------------------|-------|
|      | Mean (SD) <sup>†</sup> | Total | Mean (SD) <sup>‡</sup> | Total |
| 2011 | 0.63 (1.19)            | 194   | 1.39 (0.97)            | 1,340 |
| 2012 | 0.83 (2.09)            | 196   | 1.33 (0.83)            | 1,530 |
| 2013 | 0.80 (2.04)            | 270   | 1.33 (0.83)            | 2,089 |
| 2014 | 0.82 (1.89)            | 284   | 1.42 (1.02)            | 2,264 |
| 2015 | 0.82 (1.77)            | 305   | 1.48 (1.24)            | 2,410 |
| 2016 | 0.72 (1.21)            | 255   | 1.46 (1.12)            | 2,671 |

Note: <sup>†</sup> Average quarterly construction projects per dissemination area per year; <sup>‡</sup> Average monthly noise complaints per dissemination area per year

## 5. Interaction model results

**Table S3.** Associations of construction activities with noise complaints during permitted and non-permitted hours in Vancouver, Canada (2011 – 2016)

|                                   | Dependent Variable: Noise complaints |                         |
|-----------------------------------|--------------------------------------|-------------------------|
|                                   | Model 5                              | Model 6                 |
|                                   | IRR (95% CI)                         | IRR (95% CI)            |
| Year                              | 1.063*** (1.041, 1.090)              | 1.064*** (1.042, 1.089) |
| Major constructions               | 1.059*** (1.018, 1.095)              | 1.031* (0.987, 1.070)   |
| After hours                       | 1.528*** (1.408, 1.649)              | 1.463*** (1.339, 1.586) |
| Major constructions X After hours |                                      | 1.050*** (1.012, 1.087) |
| Population density                | 1.000 (1.000, 1.000)                 | 1.000 (1.000, 1.000)    |
| % Female                          | 1.228 (0.396, 4.140)                 | 1.253 (0.371, 4.157)    |
| % Children (< 15 yr)              | 0.170** (0.028, 1.062)               | 0.169** (0.025, 0.881)  |
| % Seniors (> 65 yr)               | 0.383*** (0.179, 0.746)              | 0.379*** (0.191, 0.715) |
| Median household income           | 1.000 (1.000, 1.000)                 | 1.000 (1.000, 1.000)    |
| % Renter occupied homes           | 0.811 (0.533, 1.189)                 | 0.799 (0.545, 1.213)    |
| Voting rate                       | 1.249 (0.444, 3.652)                 | 1.210 (0.444, 3.624)    |
| # of eating and drinking places   | 1.005*** (1.003, 1.007)              | 1.005*** (1.003, 1.007) |
| Transportation-related noise      | 1.012 (0.993, 1.028)                 | 1.013 (0.996, 1.029)    |
| Random Effect                     |                                      |                         |
| # of Dissemination Area           | 114                                  | 114                     |
| Dissemination Area Variance       | 0.017                                | 0.017                   |
| N                                 | 1,964                                | 1,964                   |
| Log Likelihood                    | -2,888.65                            | -2,882.11               |
| AIC                               | 5,805.30                             | 5,794.21                |
| BIC                               | 5,883.45                             | 5,877.96                |

*Note:* Of the 119 dissemination areas, there are 5 Dissemination Areas (DAs) with unmatched sample in Models 4 and 5.

*Significance levels:* \*  $p < 0.10$ , \*\*  $p < 0.05$ , \*\*\*  $p < 0.01$

IRR means Incidence Rate Ratio.



## 6. Comparison of noise exemptions across North American cities

**Table S4.** A list of North American cities with noise exemptions

| City                  | Permitted hours                                                                                                                                                | Noise exemption fee                                  | Exemption conditions                                                                                                              | Municipal codes (Source)                                                |
|-----------------------|----------------------------------------------------------------------------------------------------------------------------------------------------------------|------------------------------------------------------|-----------------------------------------------------------------------------------------------------------------------------------|-------------------------------------------------------------------------|
| City of New York      | 7am – 6pm (M-F)                                                                                                                                                | \$100-\$500 (USD) application fee and \$80 daily fee | Construction activity before 7:00 am, after 6:00 pm, or on the Weekend and approved Noise Mitigation Plan                         | Title 15 Rules of the City of New York (RCNY) Chapter 28, Local Law 113 |
| City of San Francisco | 7am – 8pm                                                                                                                                                      | \$123 (USD)                                          | No high-impact and/or pneumatic tools and equipment. No excavation work. Noise level no more than 10 dBA above the local ambient. | San Francisco Police Code Article 29                                    |
| City of Los Angeles   | 7am – 9pm (M-F)<br>8am – 6pm (Sa, holidays)<br>No construction except for residents (Su)                                                                       | Application fee \$248 (USD)                          | Under written permission of the Board of Police Commissioners through its Executive Director                                      | City of Los Angeles Municipal Code, Section 41.10                       |
| City of Houston       | 7am – 10pm                                                                                                                                                     | \$68.41 (USD) (Extended daily permit.)               | Any loudspeaker, sound amplifier or any other machine or device which produces applicable dB(A) levels.                           | City of Houston Municipal Code, Section 30                              |
| City of Chicago       | 8am – 8pm                                                                                                                                                      | N/A                                                  | Emergency nature or to work on public improvements authorized by a governmental body or agency.                                   | City of Chicago Municipal Code, Section 8-32-140                        |
| City of Vancouver     | Private properties: 7:30am - 8pm (M-F), 10am-8pm (Sa);<br>City streets: 7:30am - 8pm (M-Sa), 10am - 8pm (Su & holidays)                                        | \$165-\$329 (CAD)                                    | Construction activities needing to extend beyond the permitted hours                                                              | Noise Control Bylaw 6555                                                |
| City of Toronto       | 7am - 7pm (M-F); 9am - 7pm (Sa)                                                                                                                                | \$100 (CAD)                                          | Special events; events in parks; construction that extends beyond permitted hours                                                 | Toronto Municipal Code Chapter 591, Noise                               |
| City of Calgary       | 7am - 10pm (M-Sa); 9am - 10pm (Su & holidays)                                                                                                                  | N/A                                                  | Any events, including construction, expected to exceed the permitted noise levels                                                 | Community Standards Bylaw 5M2004                                        |
| City of Ottawa        | Residential neighborhoods: 7am - 8pm (M-F), 9am - 7pm (Weekends & holidays); Any structure, highway or building: 7am - 10pm (M-Sa), 9am - 10pm (Su & holidays) | \$50 (CAD)                                           | Construction noise not exceeding 85 dBA; duration of exemption not exceeding 11 days                                              | Noise By-Law 2017-255                                                   |

## References

- City of Vancouver, 2016, “Noise Control Bylaw 6555”, Canada,  
<http://former.vancouver.ca/bylaws/6555c.PDF>
- City of Vancouver, 2017a, “2017 By-election Municipal Election Official Results” *Municipal Elections*,  
<http://data.vancouver.ca/datacatalogue/municipalElectionResults.htm>
- City of Vancouver, 2017b, “3–1–1 case location details” *Open data catalogue*,  
<http://data.vancouver.ca/datacatalogue/311caseVolume.htm>
- City of Vancouver, 2018, “Statistics on construction activity” *Home, property, and development*,  
<http://vancouver.ca/home-property-development/statistics-on-construction-activity.aspx>
- DMTI, 2016, “CanMap. Content Suite Data Dictionary 2016.3 Release”
